# Supplementary material for: NOS2 and COX2 Provide Key Spatial Targets that Determine Outcome in ER− Breast Cancer
Source: PubMed Central journal article supplement (PMC10769386; doi:10.1101/2023.12.21.572859), 2023-12-23
Supplement: media-1.pdf [file media-1.pdf]

## Comparison of NOS2 and COX2 Expression Signal Intensities

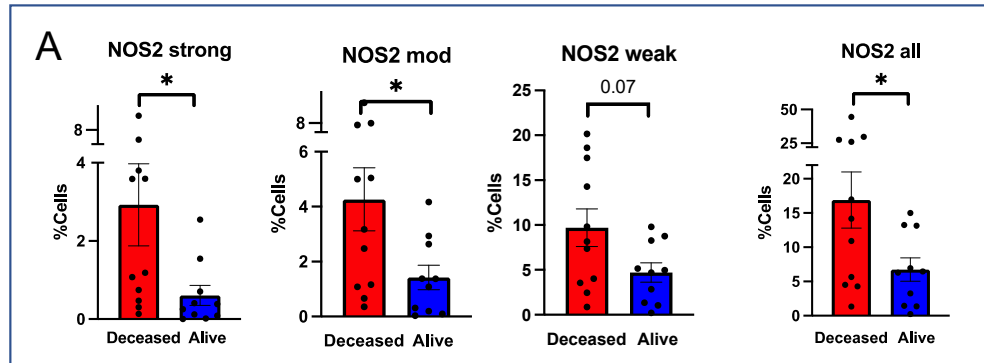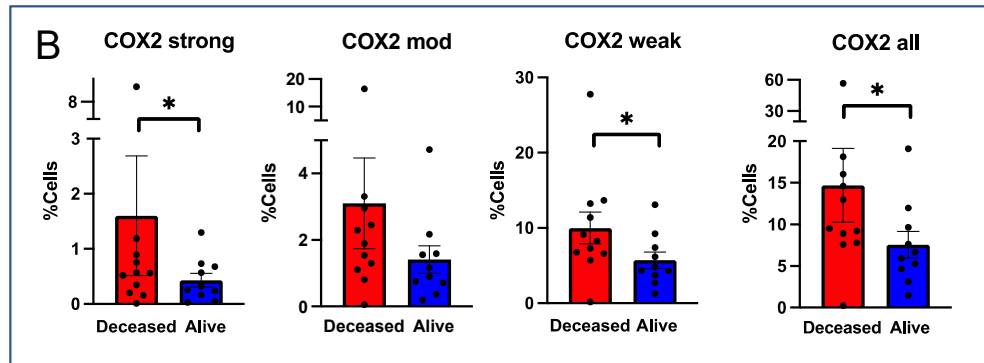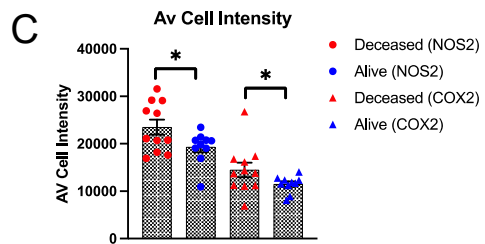

**A**  
**TNBC Tumors**

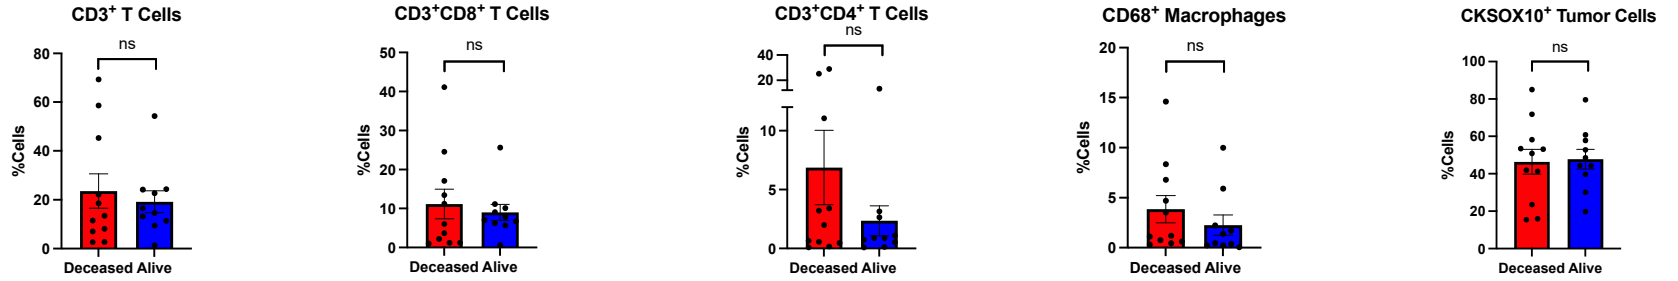

**Murine 4T1 Tumors**

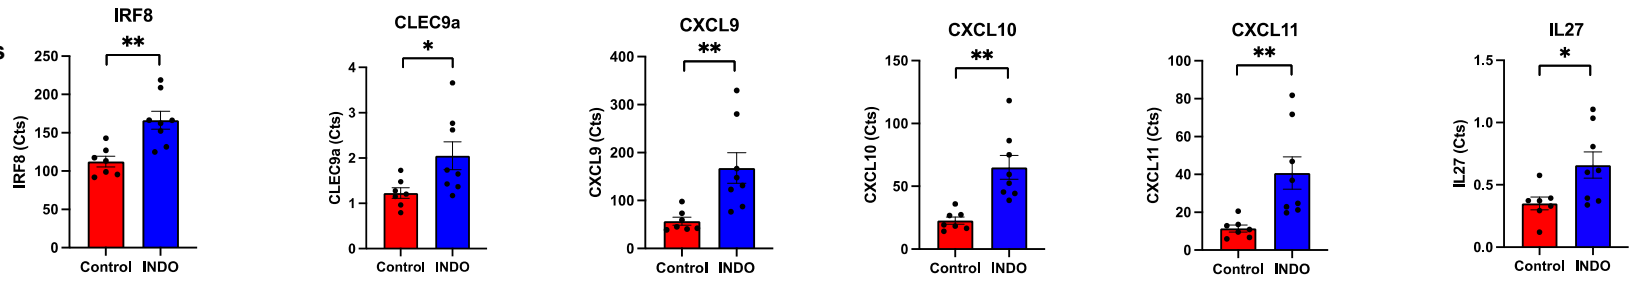

**B**

|       |                |       |                |
|-------|----------------|-------|----------------|
| 15738 | CD8+NOS2+COX2+ | 16171 | CD8+NOS2-COX2- |
| 14568 | CD8+NOS2+COX2+ | 14730 | CD8+NOS2-COX2- |
| 14509 | CD8-NOS2-COX2+ | 14439 | CD8+NOS2-COX2+ |
| 12857 | CD8+NOS2+COX2+ | 14090 | CD8+NOS2-COX2+ |
| 12811 | CD8+NOS2+COX2+ | 13780 | CD8-NOS2-COX2- |
| 12197 | CD8+NOS2+COX2+ | 12887 | CD8+NOS2-COX2- |
| 12123 | CD8-NOS2-COX2+ | 12801 | CD8+NOS2-COX2- |
| 11577 | CD8+NOS2-COX2- | 11742 | CD8+NOS2-COX2+ |
| 11431 | CD8-NOS2-COX2+ | 11435 | CD8+NOS2-COX2+ |
| 10929 | CD8+NOS2-COX2+ | 10330 | CD8+NOS2-COX2- |
| 10197 | CD8-NOS2-COX2+ |       |                |

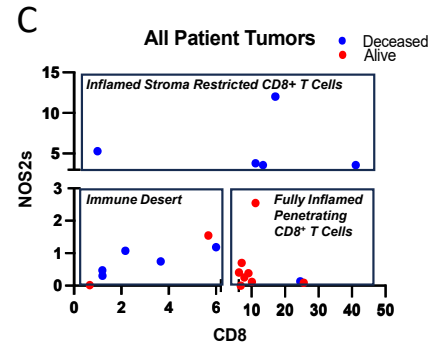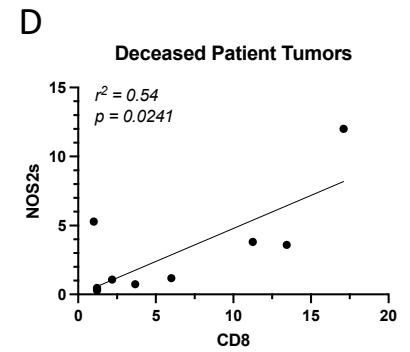

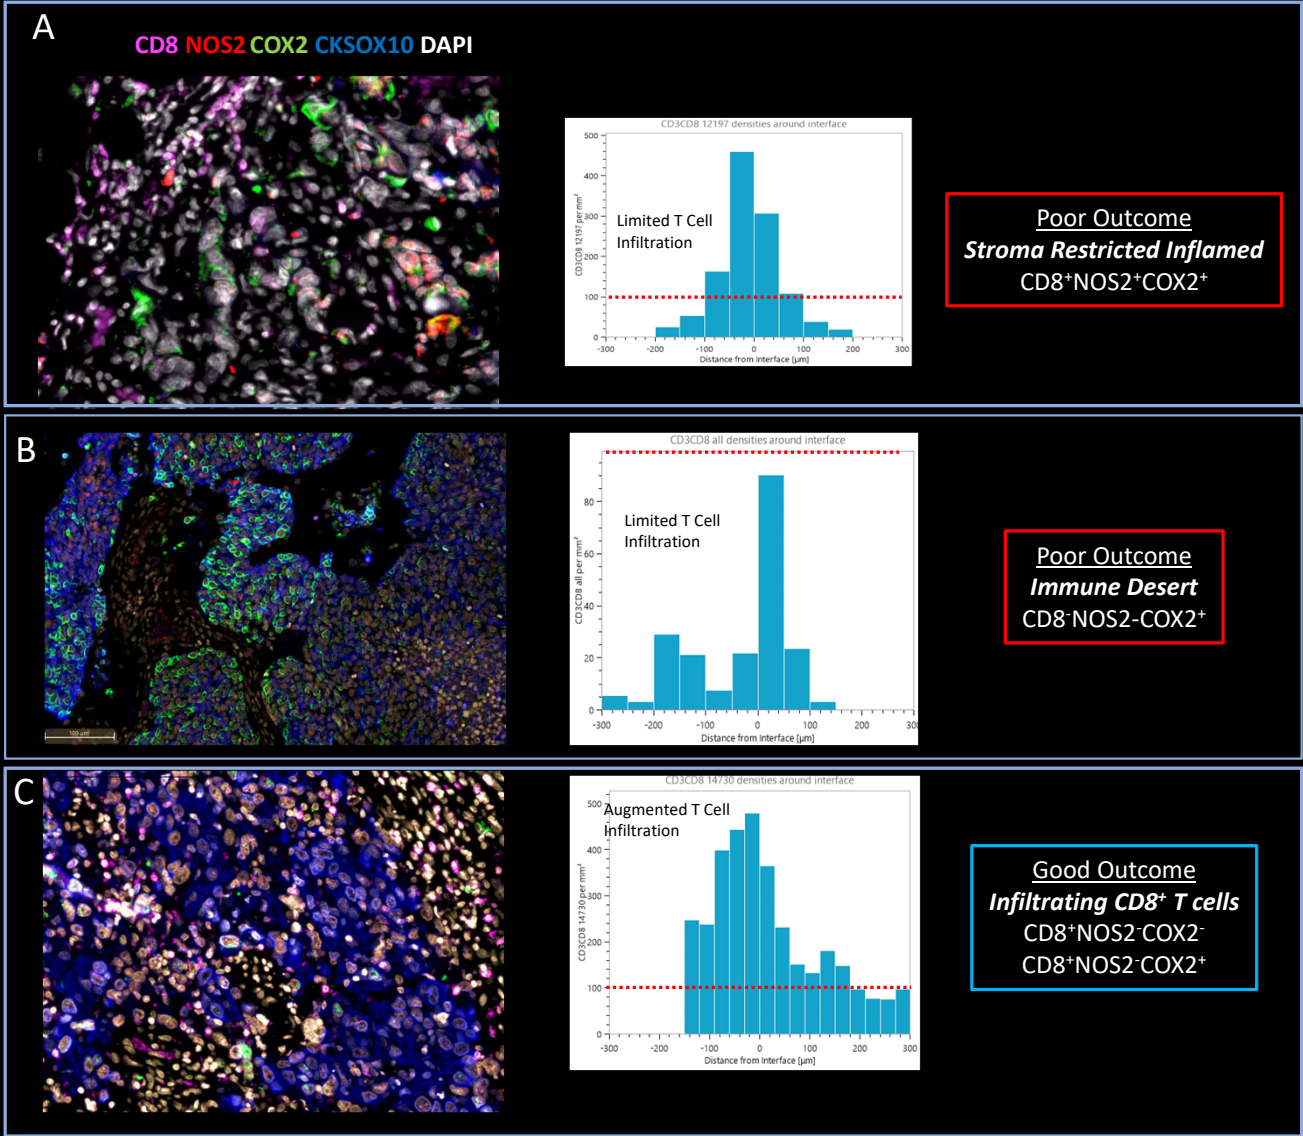

Suppl. Fig. 3

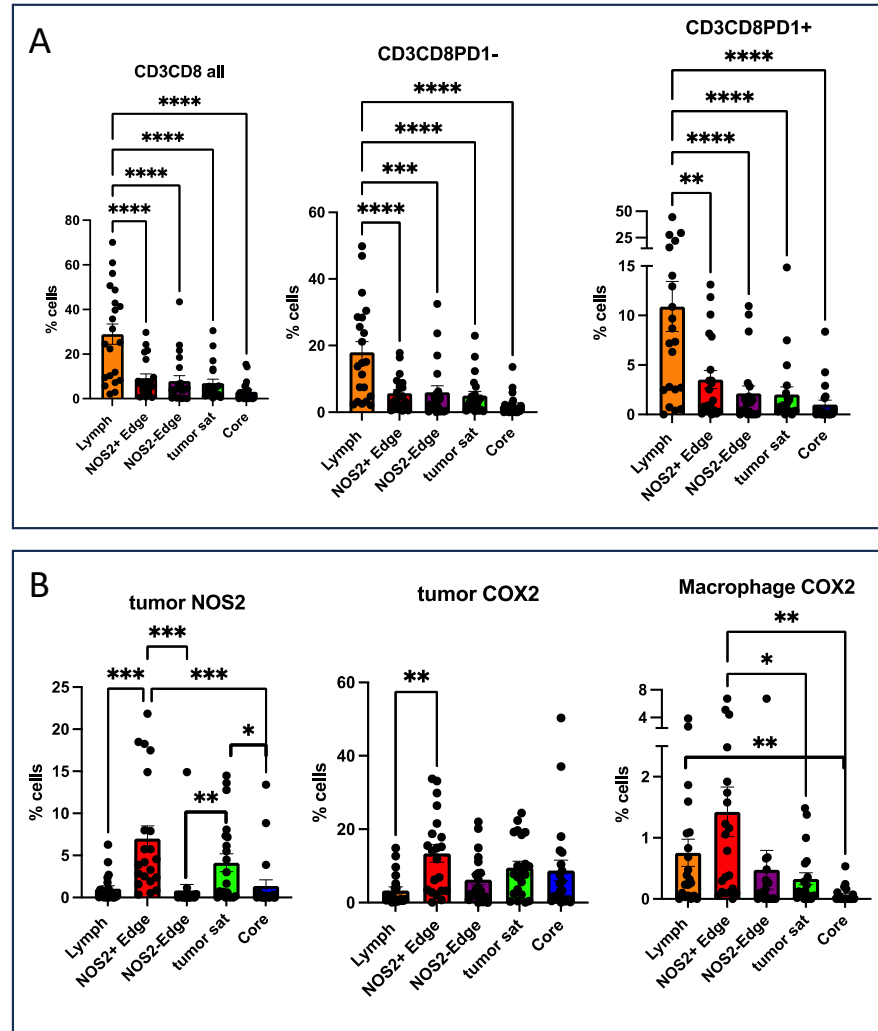

Suppl. Fig. 4
